# Supplementary material
Source: Springer Nature journal article supplement (https://www.springermedizin.de/resource/supplementary/13256_2007_439_MOESM3_ESM.pdf/9645990)

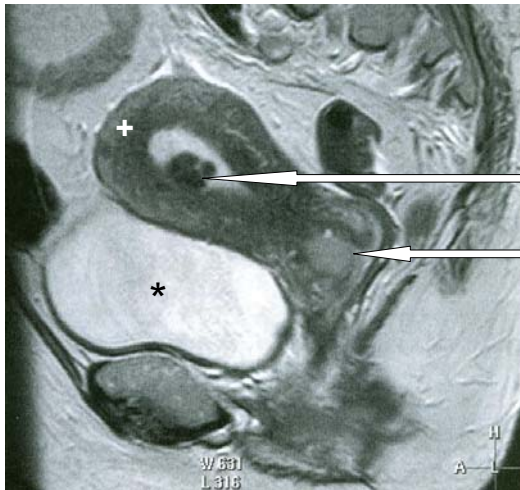

Submucosal fibroids

Mass in endocervix

Uterine fundus (+)

Bladder (\*)

Supplement: MOESM3 [file 9645990]
